# Supplementary material
Source: Elsevier journal article supplement (https://www.sciencedirect.com/science/article/pii/S2173509315000859)
Supplement: mmc1 [file S2173509315000859:mmc1.docx]

# Supplementary material

Table 1. Other variables included in the general characteristic of the serie.

| Variables | N | Median (SD)/IQR* |
| --- | --- | --- |
| Systolic blood pressure (mm Hg) | 157 | 122.17 (24.41) |
| Diastolic blood pressure (mm Hg) | 155 | 71.06 (13.64) |
| Average blood pressure (mm Hg) | 155 | 89.22 (15.32) |
| Heart rate (bpm) | 161 | 104.42 (19.08) |
| Breath per minute | 72 | 22 (IP25-P75 10) |
| Body temperature (ºC) | 122 | 36.45 (IP25-P75 0.74) |
| O2 saturation (on room air, %) | 65 | 98 (IP25-P75 3.5) |
| Total IU of insulin per day | 122 | 47.98 (17.84) |
| Serum Ca2+ (total) (mmol/l) | 129 | 2.35 (0.19) |
| Total protein (gr/l) | 129 | 74 (IP25-P75 11) |
| Total bilirubin (µmol/l) | 140 | 8.55 (IP25-P75 5.47-12.9) |
| ALT (GPT) (U/L) | 142 | 18 (IP25-P75 13.5) |
| AST (GOT) (U/L) | 143 | 20 (IP25-P75 14) |
| Amylase (U/L) | 78 | 46 (IP25-P75 45.75) |
| Lipase (U/L) | 14 | 106.21 (206.57) |
| Haemoglobin (gr/l) | 162 | 143.8 (173) |
| Troponin I (< 0.01 µg/l) | 59 | 0.03 (5.1) |
| Platelets/mm3 | 163 | 303,869 (120,078.78) |
| Total leucocytes /mm3 | 161 | 12,200 (IP25-P75 12,090) |
| Total lymphocytes/mm3 | 159 | 1,700 (IP25-P75 1,190) |
| Total neutrophil/mm3 | 161 | 10,000 (IP25-P75 11,390.5) |
| Fibrinogen (µmol/l) | 139 | 12.46 (IP25-P75 7.06) |

Table 2. Length of stay, duration of DM and admission rates according to the severity of DKA episodes (mild, moderate, severe).

| Variables | Mild DKA  N Median/% | Moderate DKA  N Median/% | Severe DKA  N Median/% | Χ2 | *p value* |
| --- | --- | --- | --- | --- | --- |
| ICS length of stay (days)♯ | 14 0 (0-3)* | 29 0 (1-5)* | 70 2 (0-8)* | 29.747 | <0.001 |
| Total inward (days)♯2 | 26 7 (Ip25-p75 5) | 49 7 (Ip25-p75 3) | 78 9.5 (Ip25-p75 6) | 8.709 | 0.013 |
| Hours in ED♯3 | 29 11 (Ip25-p75 13) | 51 10 (Ip25-p75 15) | 81 3 (Ip25-p75 7) | 20.915 | <0.001 |
| ICS admission (yes/no)♯4 | 31 3 (9.7%) | 52 14 (26.9%) | 81 62 (76.5%) | 53.918 | <0.001 |
| Hospital admission (yes/no)♯4 | 31 22 (71%) | 52 50 (96.2%) | 81 70 (86.4%) | 10.611 | 0.005 |
| Duration of DM (years)♯5 | 22 13 (Ip25-p75 13) | 36 17 (Ip25-p75 9) | 69 12 (Ip25-p75 13) | 4.065 | 0.131 |

* Median (minimum–maximum).

♯ Mild vs. moderate: MW-U =170.5, Z =-1.105; p=0.31. Mild vs. severe: MW-U=158.5, Z=-4.057; p<0.001. Moderate vs. severe: MW-U=461.5, Z=-4.356; p<0.001.

♯2 Mild vs. moderate: MW-U =602.5, Z =-0.386; p=0.7. Mild vs. severe: MW-U=696, Z=-2.394; p=0.017. Moderate vs. severe: MW-U=1431, Z=-2.384; p=0.017.

♯3 Mild vs. moderate: MW-U =626.5, Z =-1.132; p=0.26. Mild vs. severe: MW-U=535, Z=-4.348; p<0.001. Moderate vs. severe: MW-U=1423, Z=-3.01; p=0.003.

♯4 It is expressed in the number of patients (and its corresponding percentage).

♯5 Mild vs. moderate: MW-U =326,5, Z =-1.116; p=0.264. Mild vs. severe: MW-U=709, Z=-0.464; p=0.643. Moderate vs. severe: MW-U=945, Z=-2.007; p=0.045.
